# Supplementary material for: Therapeutic effect of mesenchymal stem cells derived from human umbilical cord in rabbit temporomandibular joint model of osteoarthritis
Source: PubMed Central journal article supplement (PMC6761110; doi:10.1038/s41598-019-50435-2), 2019-09-25

# **Therapeutic effect of mesenchymal stem cells derived from the human umbilical cord in a rabbit temporomandibular joint model of osteoarthritis**

Hyunjeong Kim<sup>1</sup>, Gwanghyun Yang<sup>1</sup>, Jumi Park<sup>2</sup>, Jene Choi<sup>3</sup>, Eunju Kang<sup>4</sup>, Bu-Kyu Lee<sup>1, 4, 5\*</sup>

<sup>1</sup>Biomedical Engineering Research Center, Asan Institute for Life Sciences, Asan Medical Center, College of Medicine, University of Ulsan, Seoul, Republic of Korea

<sup>2</sup>Department of Stem Cell Center, Asan Institute for Life Sciences, Asan Medical Center, Seoul, Republic of Korea

<sup>3</sup>Department of Pathology, Asan Medical Center, College of Medicine, University of Ulsan, Seoul, Republic of Korea

<sup>4</sup>Department of Stem Cell Center, Asan Institute for Life Science, Asan Medical Center, College of Medicine, University of Ulsan, Seoul, Republic of Korea

<sup>5</sup>Department of Oral and Maxillofacial Surgery, Asan Medical Center, College of Medicine, University of Ulsan, Seoul, Republic of Korea

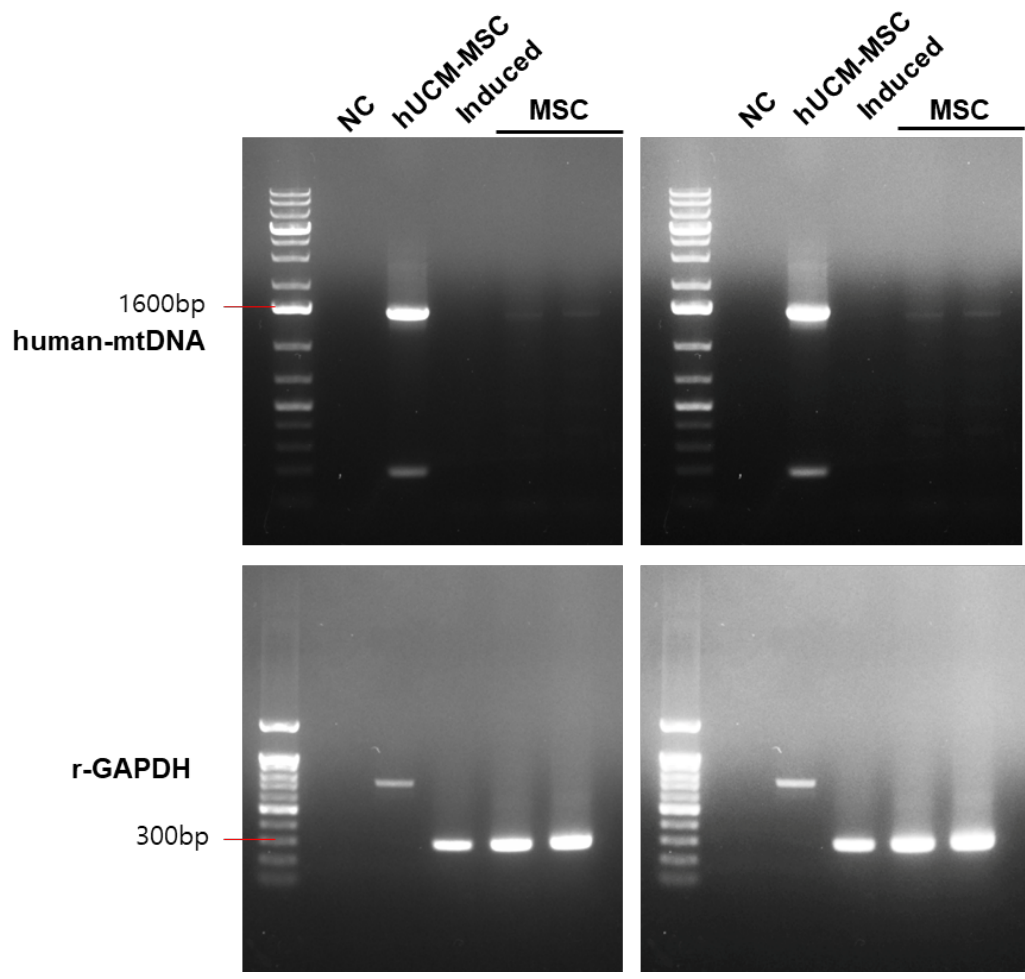

Supplement: 41598_2019_50435_MOESM1_ESM.pdf [file 41598_2019_50435_MOESM1_ESM.pdf]
